# Supplementary material for: Sensing of perfluorinated compounds using a functionalized tricolor upconversion nanoparticle based fluorescence sensor array
Source: Royal Society of Chemistry journal article supplement (doi:10.1039/d0en00554a), 2020-01-01
Supplement: d0en00554a1.pdf [file d0en00554a1.pdf]

## **Sensing of Perfluorinated Compounds Using Functionalized Tricolor Upconversion Nanoparticles based Fluorescent Sensor Array**

Mingyuan Yin<sup>1</sup>, Lihua Che<sup>1</sup>, Shizheng Jiang<sup>1</sup>, Qiliang Deng<sup>\*,1</sup>, Shuo Wang<sup>\*,1,2</sup>

<sup>1</sup> State Key Laboratory of Food Nutrition and Safety, School of Food Engineering and Biotechnology, College of Chemical Engineering and Materials Science, Tianjin University of Science and Technology, Tianjin 300457, People's Republic of China.

<sup>2</sup> Tianjin Key Laboratory of Food Science and Health, School of Medicine, Nankai University, Tianjin, 300071, People's Republic of China.

\* Corresponding author: Qiliang Deng or Shuo Wang. E-mail: [yhdql@tust.edu.cn](mailto:yhdql@tust.edu.cn) or [wangshuo@nankai.edu.cn](mailto:wangshuo@nankai.edu.cn)

## **Synthesis of Multicolour UCNPs**

Multicolour NaYF<sub>4</sub> upconversion nanoparticles with different dopants (including NaYF<sub>4</sub>:Yb/Er (20/2 mol%), NaYF<sub>4</sub>:Er/Tm (10/2 mol%) and NaYF<sub>4</sub>:Yb/Tm (20/1 mol%)) were synthesized by the typical thermal coprecipitation method. Herein, the synthesis of NaYF<sub>4</sub>:Yb/Er (20/2 mol%) was taken as an example. In a typical experiment, RE (CH<sub>3</sub>COO)<sub>3</sub> (1.0 mM, Y:Yb:Er 78:20:2) was dissolved in a three-necked flask containing OA (6.0 mL) and ODE (17.0 mL), and the system was kept at 160 °C for 30 min to form a transparent solution under vigorous stirring at argon atmosphere. Next, the system was kept at room temperature for 1h, and 10.0 mL methanol containing NaOH (2.5 mM) and NH<sub>4</sub>F (4.0 mM) was dropwise added to keep for another 30 min. Then methanol was removed by rotary evaporation at 70 °C. Subsequently, the system was kept at 300 °C for 1 h under vigorous stirring at argon atmosphere, and then cooled down to room temperature. The UCNPs were collected via centrifugation (12186 × g, 10 min). The obtained materials were washed with ethanol and then dried in air.

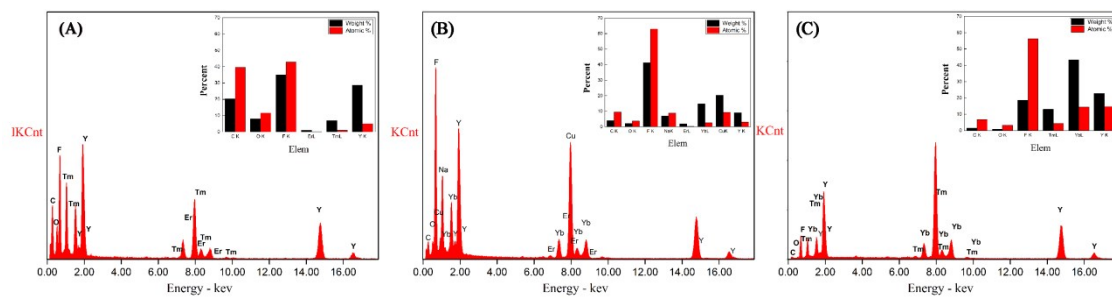

**Figure S1** EDS of R-UCNPs (A), G-UCNPs (B), and L-UCNPs (C).

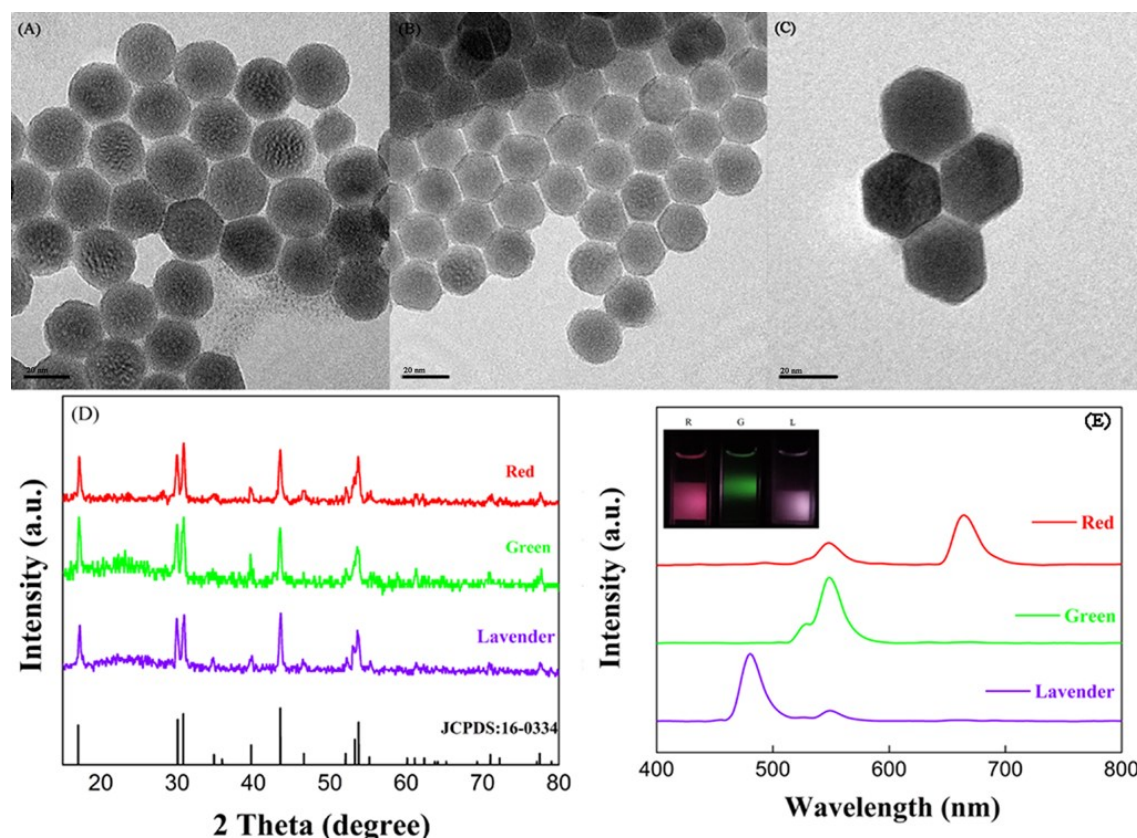

**Figure S2** TEM images of L-UCNPs (A), G-UCNPs (B), R-UCNPs (C), XRD of UCNPs (D), and fluorescence emission spectrum of UCNPs (E).

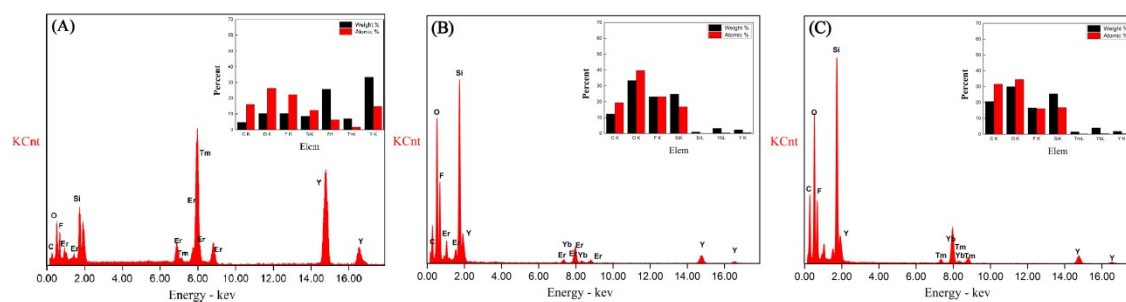

**Figure S3** EDS of R-UCNPs@SiO<sub>2</sub>-F (A), G-UCNPs@SiO<sub>2</sub>-F (B), and L-UCNPs@SiO<sub>2</sub>-F (C).

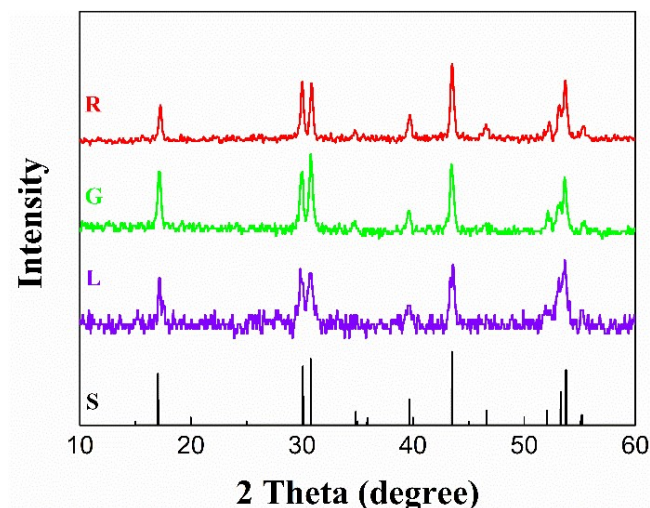

**Figure S4** XRD patterns of L-UCNPs@SiO<sub>2</sub>-F (a), G-UCNPs@SiO<sub>2</sub>-F (b), R-UCNPs@SiO<sub>2</sub>-F (c), and standard alignment card (s).

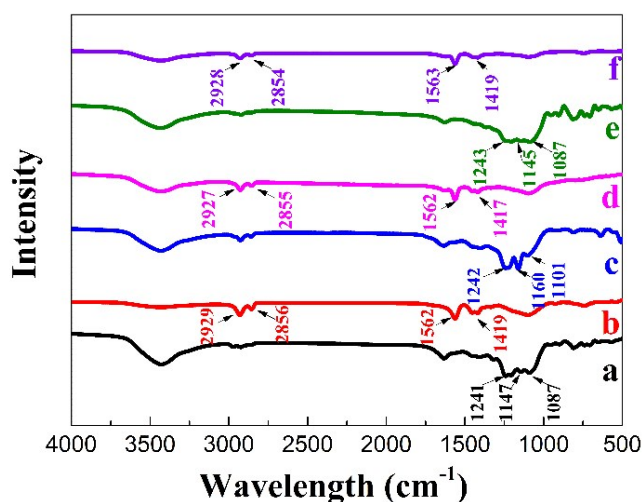

**Figure S5** FT-IR spectra of G-UCNPs@SiO<sub>2</sub>-F (a), G-UCNPs (b), L-UCNPs@SiO<sub>2</sub>-F (c), L-UCNPs (d), R-UCNPs@SiO<sub>2</sub>-F (e) and R-UCNPs (f).

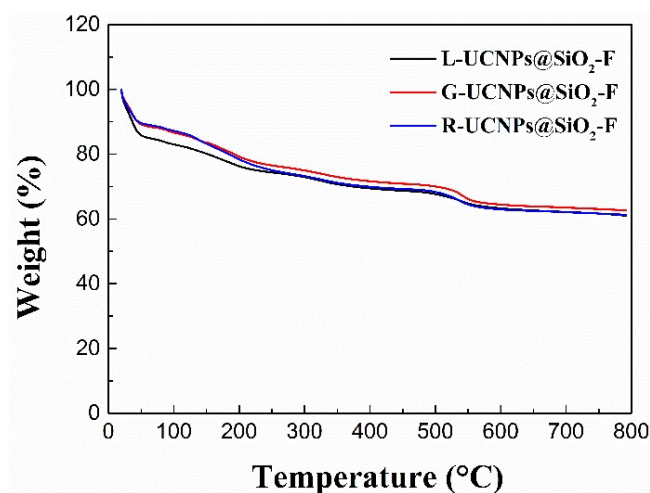

**Figure S6** Thermogravimetric analysis of UCNPs@SiO<sub>2</sub>-F materials.

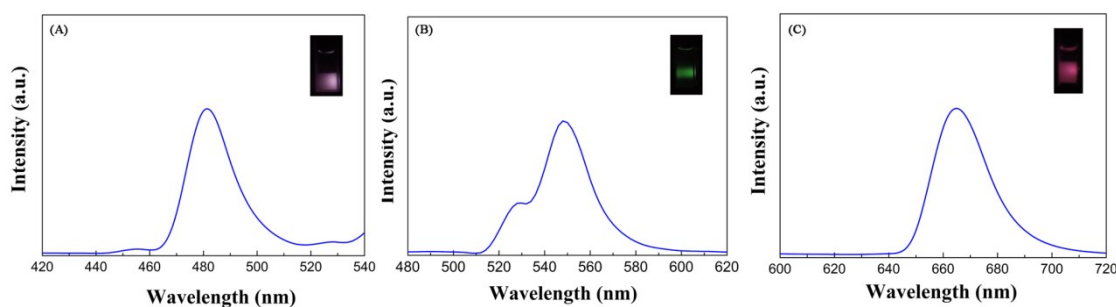

**Figure S7** Fluorescence emission spectra of L-UCNPs@SiO<sub>2</sub>-F (A), G-UCNPs@SiO<sub>2</sub>-F (B), R-UCNPs@SiO<sub>2</sub>-F (C), and the inset photos under 980 nm excitation wavelength.

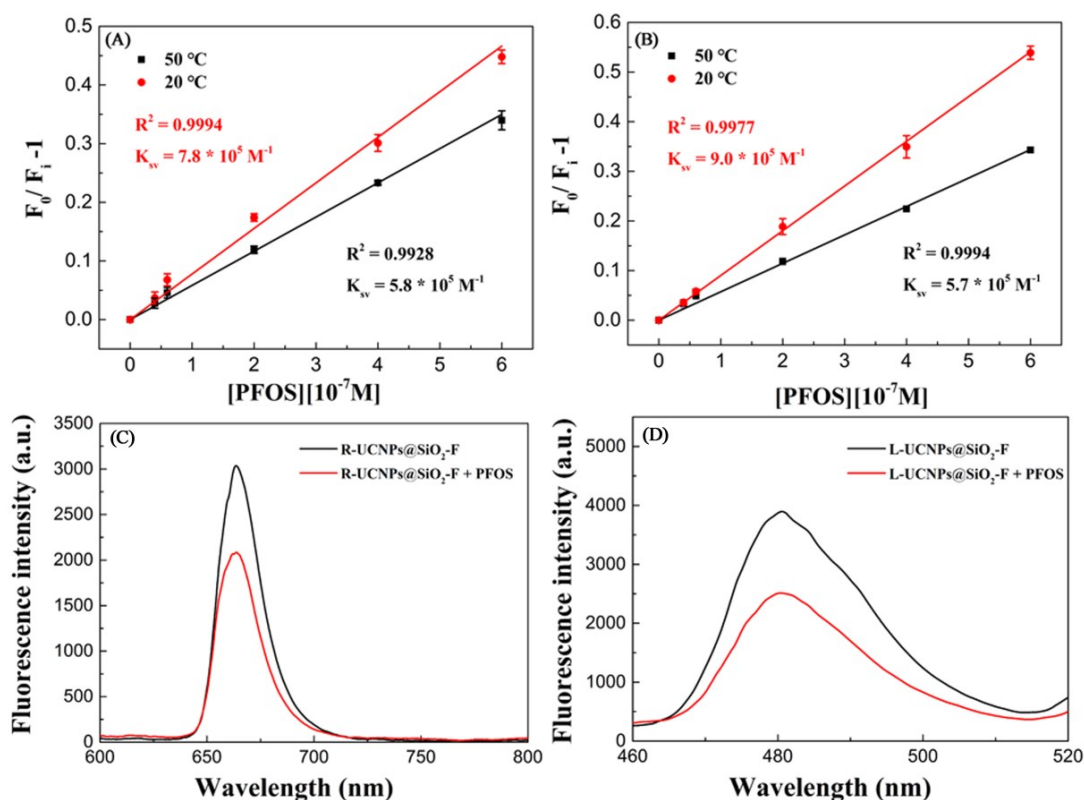

**Figure S8** Stern-Volmer plots of  $F_0/F_i - 1$  vs  $[PFOS][10^{-7}M]$  (A) R-UCNPs@SiO<sub>2</sub>-F and (B) L-UCNPs@SiO<sub>2</sub>-F (The fluorescence quenching of UCNPs@SiO<sub>2</sub>-F (0.40 mg mL<sup>-1</sup>) to different amounts of perfluorooctane sulfonate potassium (PFOS, 0 -  $6.0 \times 10^{-7}$  M) were determined at 50 °C (black line) and at 20 °C (red line), respectively). Fluorescence emission spectrum of UCNPs@SiO<sub>2</sub>-F materials treated with PFOS ( $6.0 \times 10^{-7}$  M) (C) R-UCNPs@SiO<sub>2</sub>-F and (D) L-UCNPs@SiO<sub>2</sub>-F.

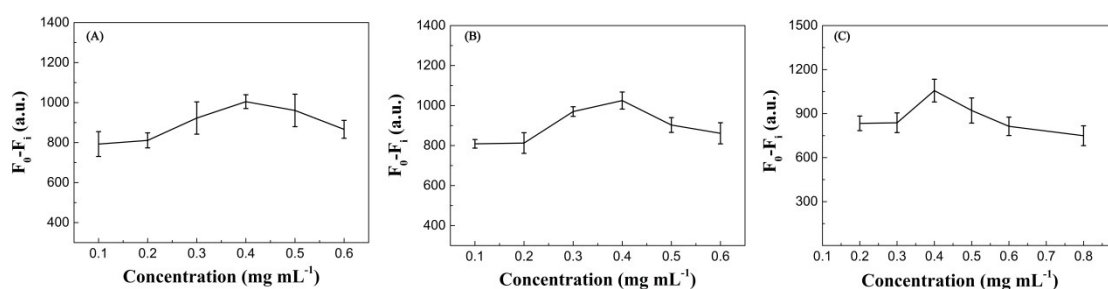

**Figure S9** Optimization of assay conditions for the concentration of the three UCNPs@SiO<sub>2</sub>-F probes treated with the model perfluorooctane sulfonate potassium ( $6.0 \times 10^{-7}$  M). (A) L-UCNPs@SiO<sub>2</sub>-F, (B) G-UCNPs@SiO<sub>2</sub>-F, and (C) R-UCNPs@SiO<sub>2</sub>-F.

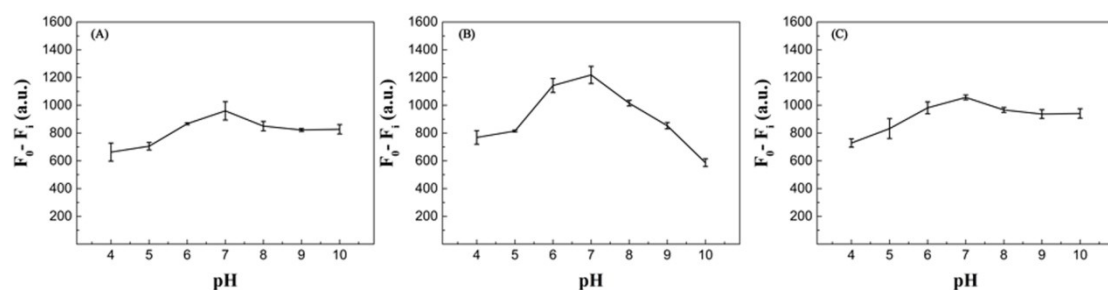

**Figure S10** Optimization of assay conditions for pH of the three UCNPs@SiO<sub>2</sub>-F probes treated with the model perfluorooctane sulfonate potassium ( $6.0 \times 10^{-7}$  M). (A) L-UCNPs@SiO<sub>2</sub>-F, (B) G-UCNPs@SiO<sub>2</sub>-F, and (C) R-UCNPs@SiO<sub>2</sub>-F.

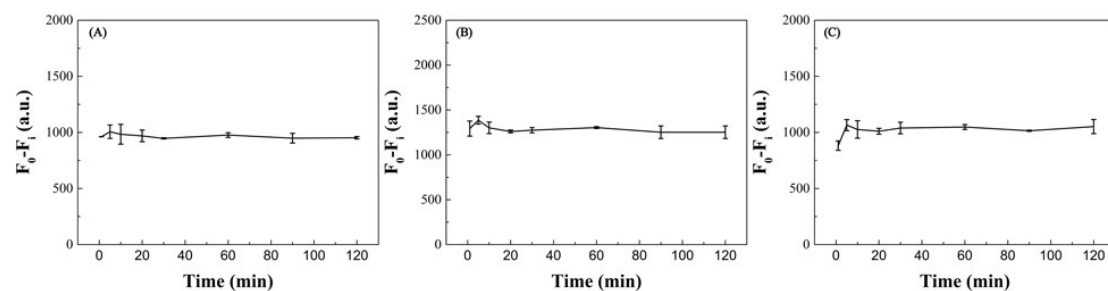

**Figure S11** Optimization of assay conditions for the incubation time of the three UCNPs@SiO<sub>2</sub>-F probes treated with the model perfluorooctane sulfonate potassium ( $6.0 \times 10^{-7}$  M). (A) L-UCNPs@SiO<sub>2</sub>-F, (B) G-UCNPs@SiO<sub>2</sub>-F, and (C) R-UCNPs@SiO<sub>2</sub>-F.



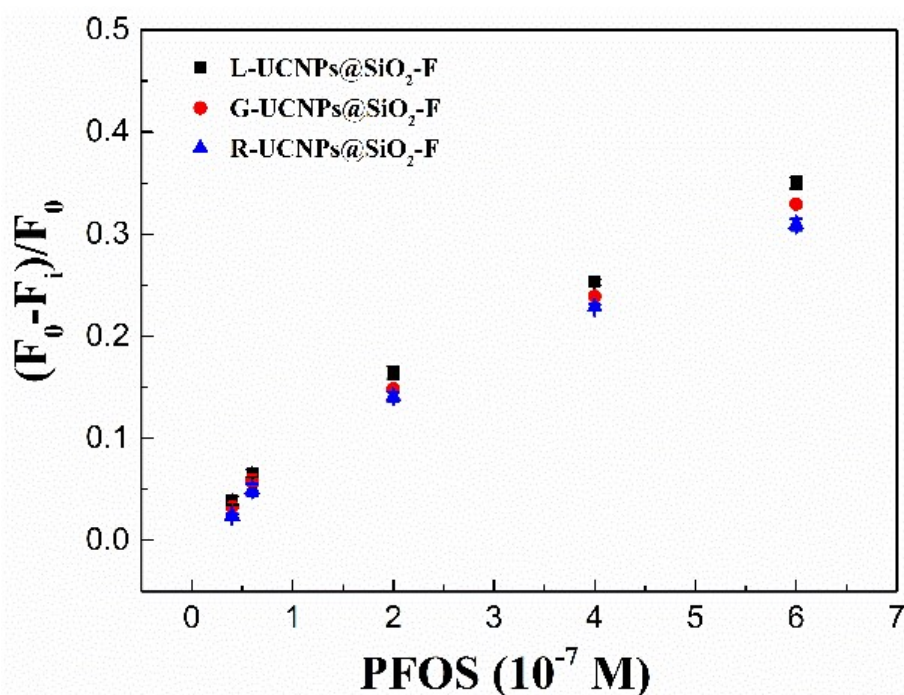

**Figure S12** Relative fluorescence intensity variety  $((F_0-F_i)/F_0)$  of the tricolor UCNPs@SiO<sub>2</sub>-F probes toward different concentration of perfluorooctane sulfonate potassium (PFOS,  $4.0 \times 10^{-8}$ – $6.0 \times 10^{-7}$  M).

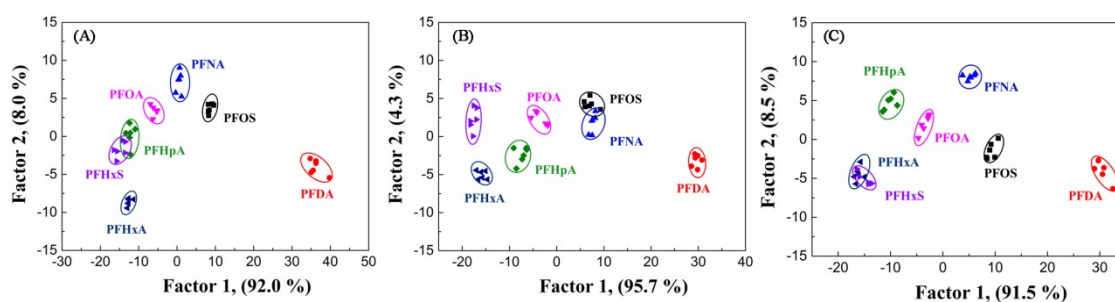

**Figure S13** Canonical score plot for perfluorinated compounds (PFCs) discrimination based on sensor array of (A) L-UCNPs@SiO<sub>2</sub>-F + G-UCNPs@SiO<sub>2</sub>-F, (B) L-UCNPs@SiO<sub>2</sub>-F + R-UCNPs@SiO<sub>2</sub>-F, and (C) G-UCNPs@SiO<sub>2</sub>-F + R-UCNPs@SiO<sub>2</sub>-F. (The detailed information of PFCs was shown in Table S1).

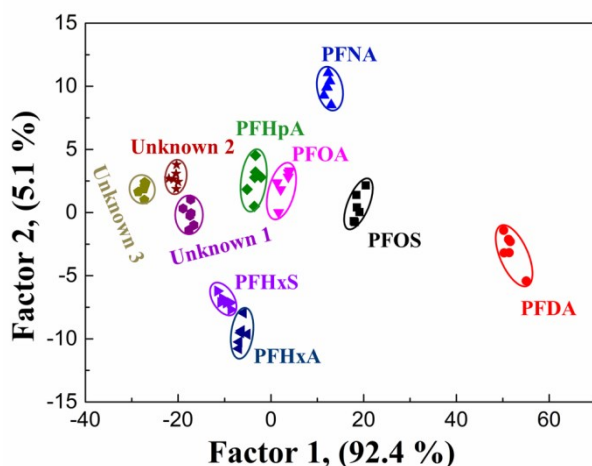

**Figure S14** Canonical score plot for the response patterns of seven PFCs and three kinds of unknown PFCs samples including perfluoropentanoic acid, potassium nonafluoro-1-butanesulfonate, and heptafluorobutyric acid.

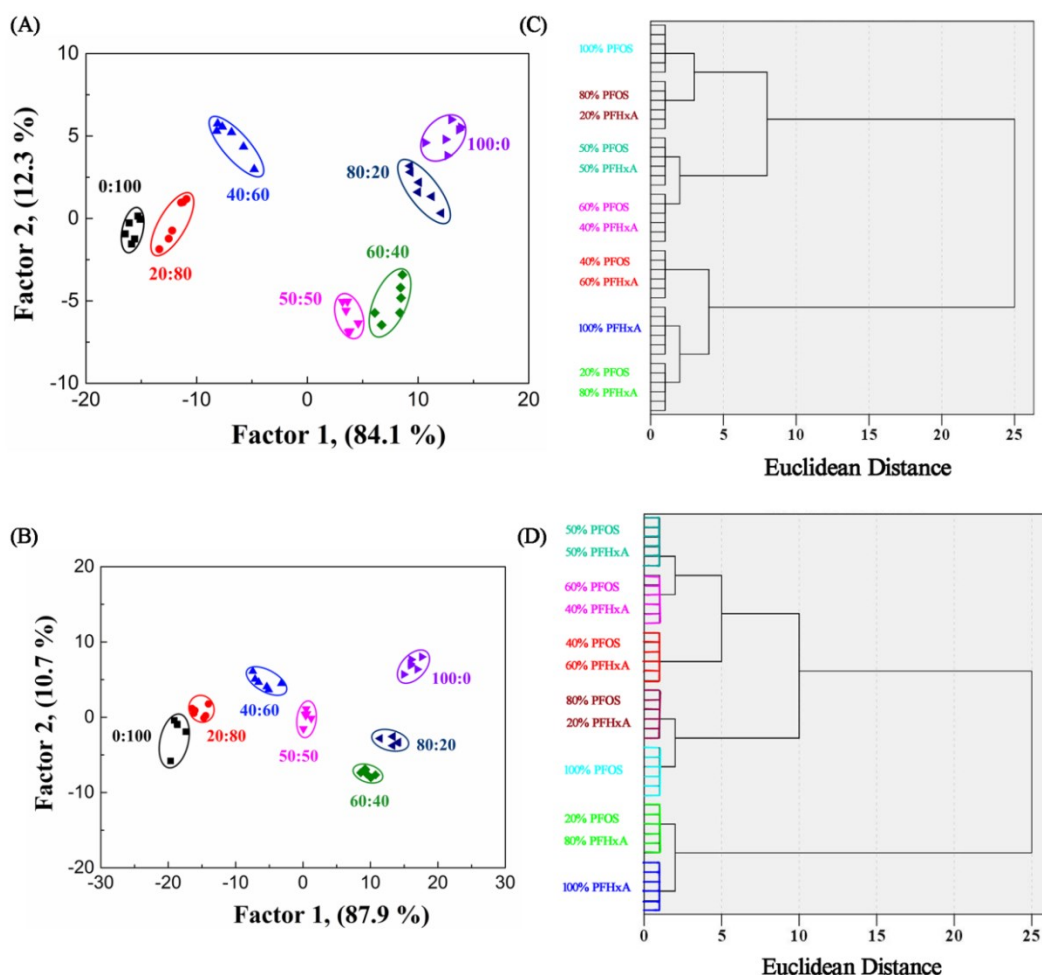

**Figure S15** Canonical score plot for the response patterns of PFCs mixtures of perfluorooctane sulfonate potassium (PFOS) and perfluorohexanoic acid (PFHxA) with different molar ratios obtained from LDA (six parallel measurements) in tap water (A) and food packing (B). Dendrogram generated by HCA of PFCs mixtures in tap water (C) and food packing (D).



**Table S1.** Comparison of the lifetime and fluorescence quantum yields.

|                                               | Lifetime (ns) | Quantum yields |
|-----------------------------------------------|---------------|----------------|
| G-UCNPs                                       | 17.81         | 2.15%          |
| G-UCNPs treated with PFOS                     | 11.42         | 0.09%          |
| G-UCNPs@SiO <sub>2</sub> -F                   | 17.57         | 1.60%          |
| G-UCNPs@SiO <sub>2</sub> -F treated with PFOS | 10.81         | 0.05%          |

**Structural information of PFCPs****Table S2.** Information of PFCPs

| Compound                                   | Structural Formula | MW (g/mol) |
|--------------------------------------------|--------------------|------------|
| Perfluorooctane sulfonate potassium (PFOS) |                    | 538.15     |
| Perfluorodecanoic acid (PFDA)              |                    | 514.09     |
| Perfluorononanoic acid (PFNA)              |                    | 464.08     |
| Perfluorooctanoic acid (PFOA)              |                    | 414.20     |

|                                                |                                                                                      |        |
|------------------------------------------------|--------------------------------------------------------------------------------------|--------|
| Perfluoroheptanoic acid (PFHpA)                | 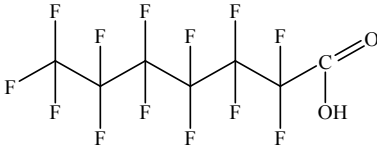   | 364.06 |
| Perfluorohexanoic acid (PFHxA)                 |    | 314.05 |
| Perfluorohexanesulfonic acid potassium (PFHxS) |    | 438.00 |
| Perfluoropentanoic acid (PFPA)                 |   | 264.00 |
| Potassium nonafluoro-1-butanesulfonate (PFBS)  |  | 338.19 |
| Heptafluorobutyric acid (PFBA)                 |  | 214.04 |

### Fluorescence Response Pattern and Linear Discriminant Analysis

**Table S3.** Training matrix of fluorescence response pattern obtained from an array of the three UCNP@SiO<sub>2</sub>-F probes against 7 PFCs ( $6.0 \times 10^{-7}$  M) in water. LDA was carried out and resulting in 3 factors of the canonical scores and group generation. Jackknifed classification matrix showed the 100% correct classification. The detailed information of PFCs was shown in Table S1.

| Analytes | Fluorescence Response Pattern |       |       | Results LDA |        |        | Group |
|----------|-------------------------------|-------|-------|-------------|--------|--------|-------|
|          | C1                            | C2    | C3    | F1          | F2     | F3     |       |
| PFOS     | 0.347                         | 0.330 | 0.308 | 9.957       | 2.834  | 2.928  | 1     |
| PFOS     | 0.346                         | 0.329 | 0.301 | 8.548       | 1.594  | 5.320  | 1     |
| PFOS     | 0.342                         | 0.325 | 0.301 | 8.064       | 2.476  | 3.798  | 1     |
| PFOS     | 0.339                         | 0.324 | 0.299 | 8.120       | 1.561  | 3.839  | 1     |
| PFOS     | 0.337                         | 0.323 | 0.295 | 7.437       | 0.816  | 4.700  | 1     |
| PFOS     | 0.335                         | 0.322 | 0.294 | 7.659       | 0.558  | 4.084  | 1     |
| PFDA     | 0.403                         | 0.427 | 0.392 | 41.131      | -6.989 | -0.103 | 2     |
| PFDA     | 0.402                         | 0.418 | 0.390 | 38.150      | -4.021 | -0.608 | 2     |
| PFDA     | 0.401                         | 0.418 | 0.387 | 37.884      | -4.695 | -0.118 | 2     |
| PFDA     | 0.399                         | 0.413 | 0.387 | 36.908      | -3.267 | -1.207 | 2     |
| PFDA     | 0.393                         | 0.413 | 0.387 | 37.911      | -4.347 | -2.450 | 2     |
| PFDA     | 0.390                         | 0.411 | 0.381 | 36.966      | -5.092 | -1.701 | 2     |
| PFNA     | 0.341                         | 0.305 | 0.303 | 3.088       | 10.748 | -0.260 | 3     |
| PFNA     | 0.337                         | 0.304 | 0.302 | 3.408       | 9.925  | -0.916 | 3     |
| PFNA     | 0.333                         | 0.302 | 0.298 | 2.902       | 9.477  | -1.017 | 3     |
| PFNA     | 0.332                         | 0.301 | 0.298 | 2.779       | 9.439  | -1.135 | 3     |
| PFNA     | 0.323                         | 0.300 | 0.295 | 3.686       | 7.686  | -2.512 | 3     |
| PFNA     | 0.320                         | 0.295 | 0.292 | 2.294       | 8.422  | -2.736 | 3     |
| PFOA     | 0.290                         | 0.272 | 0.256 | -4.687      | 3.997  | 0.061  | 4     |
| PFOA     | 0.290                         | 0.272 | 0.255 | -4.943      | 3.933  | 0.282  | 4     |
| PFOA     | 0.289                         | 0.271 | 0.254 | -5.028      | 3.668  | 0.414  | 4     |
| PFOA     | 0.289                         | 0.269 | 0.248 | -6.617      | 3.273  | 2.063  | 4     |
| PFOA     | 0.289                         | 0.267 | 0.247 | -7.304      | 3.825  | 2.056  | 4     |
| PFOA     | 0.281                         | 0.266 | 0.242 | -7.046      | 1.567  | 1.948  | 4     |
| PFHpA    | 0.257                         | 0.245 | 0.231 | -10.153     | 3.035  | -2.846 | 5     |
| PFHpA    | 0.256                         | 0.242 | 0.231 | -11.130     | 4.501  | -3.637 | 5     |
| PFHpA    | 0.250                         | 0.240 | 0.227 | -11.161     | 3.175  | -3.970 | 5     |
| PFHpA    | 0.246                         | 0.238 | 0.225 | -11.313     | 2.680  | -4.319 | 5     |
| PFHpA    | 0.246                         | 0.235 | 0.220 | -12.911     | 2.354  | -2.664 | 5     |
| PFHpA    | 0.235                         | 0.234 | 0.218 | -11.431     | 0.393  | -4.809 | 5     |
| PFHxA    | 0.207                         | 0.226 | 0.189 | -13.292     | -8.256 | -2.070 | 6     |
| PFHxA    | 0.203                         | 0.221 | 0.189 | -13.893     | -7.080 | -3.688 | 6     |
| PFHxA    | 0.202                         | 0.221 | 0.185 | -14.541     | -8.133 | -2.294 | 6     |
| PFHxA    | 0.200                         | 0.220 | 0.185 | -14.356     | -8.195 | -3.031 | 6     |
| PFHxA    | 0.199                         | 0.220 | 0.180 | -15.002     | -9.126 | -1.687 | 6     |
| PFHxA    | 0.195                         | 0.218 | 0.180 | -14.856     | -8.996 | -3.002 | 6     |
| PFHxS    | 0.239                         | 0.232 | 0.193 | -16.862     | -3.703 | 5.057  | 7     |
| PFHxS    | 0.238                         | 0.230 | 0.191 | -17.661     | -3.609 | 5.315  | 7     |
| PFHxS    | 0.232                         | 0.229 | 0.191 | -16.692     | -4.601 | 3.745  | 7     |
| PFHxS    | 0.225                         | 0.222 | 0.185 | -18.632     | -4.067 | 3.302  | 7     |
| PFHxS    | 0.223                         | 0.219 | 0.184 | -19.179     | -3.395 | 2.557  | 7     |
| PFHxS    | 0.218                         | 0.219 | 0.184 | -18.201     | -4.366 | 1.311  | 7     |

**Table S4.** Summary of the jackknifed classification matrix for seven kinds of PFCPs.

|       | PFOS | PFDA | PFNA | PFOA | PFHpA | PFHxA | PFHxS | % correct |
|-------|------|------|------|------|-------|-------|-------|-----------|
| PFOS  | 6    | 0    | 0    | 0    | 0     | 0     | 0     | 100       |
| PFDA  | 0    | 6    | 0    | 0    | 0     | 0     | 0     | 100       |
| PFNA  | 0    | 0    | 6    | 0    | 0     | 0     | 0     | 100       |
| PFOA  | 0    | 0    | 0    | 6    | 0     | 0     | 0     | 100       |
| PFHpA | 0    | 0    | 0    | 0    | 6     | 0     | 0     | 100       |
| PFHxA | 0    | 0    | 0    | 0    | 0     | 6     | 0     | 100       |
| PFHxS | 0    | 0    | 0    | 0    | 0     | 0     | 6     | 100       |
| Total | 6    | 6    | 6    | 6    | 6     | 6     | 6     | 100       |

The detailed information of PFCPs was shown in Table S1.

**Table S5.** Training matrix of fluorescence response pattern obtained from an array of the three UCNPs@SiO<sub>2</sub>-F probes against 7 PFCPs and three kinds of unknown PFCPs samples including PFPA, PFBS, and PFBA ( $6.0 \times 10^{-7}$  M) in water. LDA was carried out and resulting in 3 factors of the canonical scores and group generation. Jackknifed classification matrix showed the 100% correct classification. The detailed information of PFCPs was shown in Table S1.

| Analytes | Fluorescence Response Pattern |       |       | Results LDA |        |        | Group |
|----------|-------------------------------|-------|-------|-------------|--------|--------|-------|
|          | C1                            | C2    | C3    | F1          | F2     | F3     |       |
| PFOS     | 0.347                         | 0.330 | 0.308 | 20.464      | 2.148  | 3.933  | 1     |
| PFOS     | 0.346                         | 0.329 | 0.301 | 19.111      | 0.032  | 6.402  | 1     |
| PFOS     | 0.342                         | 0.325 | 0.301 | 18.443      | 1.389  | 4.977  | 1     |
| PFOS     | 0.339                         | 0.324 | 0.299 | 18.543      | 0.408  | 4.823  | 1     |
| PFOS     | 0.337                         | 0.323 | 0.295 | 17.873      | -0.682 | 5.665  | 1     |
| PFOS     | 0.335                         | 0.322 | 0.294 | 18.087      | -0.759 | 4.920  | 1     |
| PFDA     | 0.403                         | 0.427 | 0.392 | 55.060      | -5.418 | -4.303 | 2     |
| PFDA     | 0.402                         | 0.418 | 0.390 | 51.623      | -2.303 | -3.950 | 2     |
| PFDA     | 0.401                         | 0.418 | 0.387 | 51.387      | -3.181 | -3.535 | 2     |
| PFDA     | 0.399                         | 0.413 | 0.387 | 50.183      | -1.403 | -4.329 | 2     |
| PFDA     | 0.393                         | 0.413 | 0.387 | 51.249      | -2.120 | -6.001 | 2     |
| PFDA     | 0.390                         | 0.411 | 0.381 | 50.284      | -3.193 | -5.258 | 2     |
| PFNA     | 0.341                         | 0.305 | 0.303 | 12.370      | 11.066 | 2.771  | 3     |
| PFNA     | 0.337                         | 0.304 | 0.302 | 12.711      | 10.405 | 1.854  | 3     |
| PFNA     | 0.333                         | 0.302 | 0.298 | 12.162      | 9.927  | 1.695  | 3     |

|           |       |       |       |         |         |        |    |
|-----------|-------|-------|-------|---------|---------|--------|----|
| PFNA      | 0.332 | 0.301 | 0.298 | 12.021  | 9.914   | 1.570  | 3  |
| PFNA      | 0.323 | 0.300 | 0.295 | 12.998  | 8.516   | -0.383 | 3  |
| PFNA      | 0.320 | 0.295 | 0.292 | 11.418  | 9.276   | -0.343 | 3  |
| PFOA      | 0.290 | 0.272 | 0.256 | 4.059   | 3.302   | 2.404  | 4  |
| PFOA      | 0.290 | 0.272 | 0.255 | 3.793   | 3.153   | 2.653  | 4  |
| PFOA      | 0.289 | 0.271 | 0.254 | 3.718   | 2.826   | 2.749  | 4  |
| PFOA      | 0.289 | 0.269 | 0.248 | 2.086   | 1.818   | 4.606  | 4  |
| PFOA      | 0.289 | 0.267 | 0.247 | 1.307   | 2.364   | 4.777  | 4  |
| PFOA      | 0.281 | 0.266 | 0.242 | 1.670   | 0.012   | 4.159  | 4  |
| PFHpA     | 0.257 | 0.245 | 0.231 | -2.132  | 2.794   | -0.461 | 5  |
| PFHpA     | 0.256 | 0.242 | 0.231 | -3.319  | 4.523   | -0.922 | 5  |
| PFHpA     | 0.250 | 0.240 | 0.227 | -3.325  | 3.211   | -1.562 | 5  |
| PFHpA     | 0.246 | 0.238 | 0.225 | -3.497  | 2.778   | -2.033 | 5  |
| PFHpA     | 0.246 | 0.235 | 0.220 | -5.140  | 1.841   | -0.155 | 5  |
| PFHpA     | 0.235 | 0.234 | 0.218 | -3.574  | 0.485   | -3.039 | 5  |
| PFHxA     | 0.207 | 0.226 | 0.189 | -5.122  | -9.635  | -1.720 | 6  |
| PFHxA     | 0.203 | 0.221 | 0.189 | -5.937  | -7.945  | -3.176 | 6  |
| PFHxA     | 0.202 | 0.221 | 0.185 | -6.521  | -9.518  | -1.822 | 6  |
| PFHxA     | 0.200 | 0.220 | 0.185 | -6.363  | -9.353  | -2.655 | 6  |
| PFHxA     | 0.199 | 0.220 | 0.180 | -6.954  | -10.781 | -1.331 | 6  |
| PFHxA     | 0.195 | 0.218 | 0.180 | -6.884  | -10.245 | -2.747 | 6  |
| PFHxS     | 0.239 | 0.232 | 0.193 | -8.767  | -7.132  | 7.326  | 7  |
| PFHxS     | 0.238 | 0.230 | 0.191 | -9.637  | -7.159  | 7.699  | 7  |
| PFHxS     | 0.232 | 0.229 | 0.191 | -8.632  | -7.686  | 5.692  | 7  |
| PFHxS     | 0.225 | 0.222 | 0.185 | -10.824 | -7.112  | 5.502  | 7  |
| PFHxS     | 0.223 | 0.219 | 0.184 | -11.502 | -6.212  | 4.883  | 7  |
| PFHxS     | 0.218 | 0.219 | 0.184 | -10.468 | -6.813  | 3.233  | 7  |
| Unknown 1 | 0.199 | 0.191 | 0.177 | -17.292 | 1.030   | -1.523 | 8  |
| Unknown 1 | 0.195 | 0.190 | 0.174 | -17.212 | -0.052  | -1.750 | 8  |
| Unknown 1 | 0.194 | 0.190 | 0.173 | -17.434 | -0.253  | -1.567 | 8  |
| Unknown 1 | 0.188 | 0.189 | 0.172 | -16.609 | -0.995  | -3.205 | 8  |
| Unknown 1 | 0.187 | 0.187 | 0.168 | -17.661 | -1.393  | -2.297 | 8  |
| Unknown 1 | 0.186 | 0.183 | 0.168 | -18.920 | 0.323   | -2.824 | 8  |
| Unknown 2 | 0.187 | 0.178 | 0.171 | -20.337 | 3.787   | -3.925 | 9  |
| Unknown 2 | 0.185 | 0.177 | 0.169 | -20.449 | 3.079   | -3.789 | 9  |
| Unknown 2 | 0.182 | 0.177 | 0.168 | -20.008 | 2.436   | -4.513 | 9  |
| Unknown 2 | 0.180 | 0.176 | 0.166 | -20.396 | 1.870   | -4.196 | 9  |
| Unknown 2 | 0.178 | 0.173 | 0.165 | -20.978 | 2.641   | -4.842 | 9  |
| Unknown 2 | 0.176 | 0.171 | 0.162 | -21.988 | 2.687   | -4.396 | 9  |
| Unknown 3 | 0.179 | 0.162 | 0.150 | -27.216 | 2.398   | 0.436  | 10 |
| Unknown 3 | 0.176 | 0.161 | 0.150 | -26.989 | 2.313   | -0.337 | 10 |
| Unknown 3 | 0.169 | 0.158 | 0.147 | -27.237 | 2.092   | -1.557 | 10 |
| Unknown 3 | 0.169 | 0.157 | 0.146 | -27.405 | 1.860   | -1.460 | 10 |
| Unknown 3 | 0.166 | 0.157 | 0.144 | -27.297 | 1.003   | -1.670 | 10 |

**Table S6.** Fluorescence response patterns using the sensor array against the PFCPs mixtures of perfluorooctane sulfonate potassium (PFOS) and perfluorohexanoic acid (PFHxA) with different ratios (100:0, 80:20, 60:40, 50:50, 40:60, 20:80, and 0:100, respectively). LDA was carried out and resulting in 3 factors of the canonical scores and group generation. The concentration PFOS and PFHxA were  $6.0 \times 10^{-7}$  M.

| PFOS:PFHxA | Fluorescence Response Pattern |       |       | Results LDA |        |        | Group |
|------------|-------------------------------|-------|-------|-------------|--------|--------|-------|
|            | C1                            | C2    | C3    | F1          | F2     | F3     |       |
| 0:100      | 0.207                         | 0.226 | 0.189 | -12.966     | 3.017  | -2.760 | 1     |
| 0:100      | 0.203                         | 0.221 | 0.189 | -13.453     | 3.515  | -3.794 | 1     |
| 0:100      | 0.202                         | 0.221 | 0.185 | -13.831     | 3.191  | -3.160 | 1     |
| 0:100      | 0.200                         | 0.220 | 0.185 | -14.110     | 3.694  | -3.483 | 1     |
| 0:100      | 0.199                         | 0.220 | 0.180 | -14.438     | 3.340  | -2.883 | 1     |
| 0:100      | 0.195                         | 0.218 | 0.180 | -14.912     | 4.126  | -3.520 | 1     |
| 80:20      | 0.264                         | 0.242 | 0.219 | -5.738      | -3.320 | -2.113 | 2     |
| 80:20      | 0.253                         | 0.241 | 0.210 | -6.346      | -4.420 | -0.729 | 2     |
| 80:20      | 0.253                         | 0.236 | 0.198 | -7.267      | -6.233 | 0.369  | 2     |
| 80:20      | 0.250                         | 0.234 | 0.194 | -7.858      | -6.071 | 0.552  | 2     |
| 80:20      | 0.250                         | 0.233 | 0.193 | -7.982      | -6.361 | 0.605  | 2     |
| 80:20      | 0.244                         | 0.233 | 0.191 | -8.707      | -5.080 | 0.386  | 2     |
| 60:40      | 0.268                         | 0.280 | 0.227 | -3.214      | -3.644 | 1.892  | 3     |
| 60:40      | 0.265                         | 0.267 | 0.227 | -3.562      | -2.856 | 1.682  | 3     |
| 60:40      | 0.264                         | 0.267 | 0.227 | -3.612      | -2.825 | 1.717  | 3     |
| 60:40      | 0.264                         | 0.266 | 0.221 | -4.097      | -3.425 | 2.310  | 3     |
| 60:40      | 0.252                         | 0.264 | 0.221 | -5.367      | -0.856 | 1.336  | 3     |
| 60:40      | 0.246                         | 0.258 | 0.221 | -6.082      | -0.032 | -0.070 | 3     |
| 50:50      | 0.278                         | 0.308 | 0.267 | 1.134       | 2.183  | 2.767  | 4     |
| 50:50      | 0.277                         | 0.305 | 0.263 | 0.862       | 1.693  | 2.896  | 4     |
| 50:50      | 0.273                         | 0.299 | 0.262 | 0.139       | 2.041  | 1.872  | 4     |
| 50:50      | 0.272                         | 0.296 | 0.258 | -0.236      | 1.442  | 2.015  | 4     |
| 50:50      | 0.272                         | 0.296 | 0.257 | -0.348      | 1.435  | 1.959  | 4     |
| 50:50      | 0.271                         | 0.290 | 0.257 | -0.520      | 1.042  | 1.063  | 4     |
| 40:60      | 0.294                         | 0.345 | 0.285 | 4.742       | 3.642  | 7.171  | 5     |
| 40:60      | 0.293                         | 0.338 | 0.282 | 4.269       | 3.115  | 6.413  | 5     |
| 40:60      | 0.292                         | 0.326 | 0.277 | 3.732       | 1.526  | 4.964  | 5     |
| 40:60      | 0.292                         | 0.320 | 0.277 | 3.561       | 0.987  | 4.054  | 5     |
| 40:60      | 0.290                         | 0.311 | 0.276 | 3.114       | 0.606  | 2.575  | 5     |
| 40:60      | 0.289                         | 0.309 | 0.267 | 2.407       | -0.293 | 3.536  | 5     |
| 20:80      | 0.318                         | 0.329 | 0.332 | 10.100      | 1.999  | -1.985 | 6     |



|       |       |       |       |        |        |        |   |
|-------|-------|-------|-------|--------|--------|--------|---|
| 20:80 | 0.312 | 0.327 | 0.331 | 9.432  | 2.927  | -2.441 | 6 |
| 20:80 | 0.307 | 0.327 | 0.329 | 8.688  | 3.956  | -2.375 | 6 |
| 20:80 | 0.304 | 0.325 | 0.325 | 8.101  | 3.995  | -2.165 | 6 |
| 20:80 | 0.301 | 0.325 | 0.314 | 7.043  | 3.651  | -0.717 | 6 |
| 20:80 | 0.298 | 0.324 | 0.309 | 6.673  | 2.933  | -0.040 | 6 |
| 100:0 | 0.347 | 0.330 | 0.352 | 14.520 | -2.681 | -3.221 | 7 |
| 100:0 | 0.346 | 0.329 | 0.351 | 14.393 | -2.852 | -3.201 | 7 |
| 100:0 | 0.342 | 0.325 | 0.351 | 13.854 | -2.271 | -4.142 | 7 |
| 100:0 | 0.339 | 0.324 | 0.349 | 13.390 | -1.776 | -4.116 | 7 |
| 100:0 | 0.337 | 0.323 | 0.339 | 12.532 | -2.566 | -2.819 | 7 |
| 100:0 | 0.335 | 0.322 | 0.335 | 11.961 | -2.495 | -2.400 | 7 |

**Table S7.** Fluorescence response pattern obtained from an array of the tricolor UCNPs@SiO<sub>2</sub>-F probes against perfluorooctane sulfonate potassium at different concentrations ( $4.0 \times 10^{-8}$  –  $6.0 \times 10^{-7}$  M). LDA was carried out and resulting in 3 factors of the canonical scores and group generation. Jackknifed classification matrix showed the 100% correct classification.

| Concentration<br>(10 <sup>-7</sup> M) | Fluorescence Response Pattern |       |       | Results LDA |        |        | Group |
|---------------------------------------|-------------------------------|-------|-------|-------------|--------|--------|-------|
|                                       | C1                            | C2    | C3    | F1          | F2     | F3     |       |
| 20                                    | 0.628                         | 0.610 | 0.553 | 209.603     | 4.793  | 0.051  | 1     |
| 20                                    | 0.627                         | 0.606 | 0.552 | 208.923     | 2.942  | -0.188 | 1     |
| 20                                    | 0.624                         | 0.605 | 0.549 | 207.912     | 3.708  | -0.228 | 1     |
| 20                                    | 0.619                         | 0.599 | 0.542 | 205.950     | 3.302  | -0.719 | 1     |
| 20                                    | 0.619                         | 0.595 | 0.541 | 205.821     | 1.353  | -1.091 | 1     |
| 20                                    | 0.616                         | 0.593 | 0.536 | 205.284     | 1.654  | -1.544 | 1     |
| 6.0                                   | 0.347                         | 0.328 | 0.321 | 65.146      | -4.465 | 1.513  | 2     |
| 6.0                                   | 0.346                         | 0.327 | 0.318 | 65.700      | -4.773 | 0.986  | 2     |
| 6.0                                   | 0.342                         | 0.322 | 0.310 | 64.664      | -4.812 | 0.276  | 2     |
| 6.0                                   | 0.339                         | 0.322 | 0.306 | 63.747      | -3.485 | 0.098  | 2     |
| 6.0                                   | 0.337                         | 0.321 | 0.293 | 65.759      | -2.914 | -1.787 | 2     |
| 6.0                                   | 0.335                         | 0.320 | 0.293 | 64.136      | -2.075 | -1.398 | 2     |
| 4.0                                   | 0.262                         | 0.249 | 0.252 | 22.031      | -4.071 | 2.414  | 3     |
| 4.0                                   | 0.258                         | 0.246 | 0.237 | 22.739      | -3.275 | 0.581  | 3     |
| 4.0                                   | 0.256                         | 0.245 | 0.231 | 22.863      | -2.652 | -0.091 | 3     |
| 4.0                                   | 0.255                         | 0.249 | 0.231 | 22.579      | 0.053  | 0.356  | 3     |
| 4.0                                   | 0.254                         | 0.242 | 0.228 | 22.729      | -3.251 | -0.555 | 3     |
| 4.0                                   | 0.249                         | 0.242 | 0.225 | 19.711      | -0.893 | 0.106  | 3     |
| 2.0                                   | 0.161                         | 0.158 | 0.166 | -28.554     | -2.064 | 3.088  | 4     |
| 2.0                                   | 0.160                         | 0.154 | 0.164 | -29.547     | -3.122 | 2.947  | 4     |
| 2.0                                   | 0.156                         | 0.152 | 0.158 | -30.328     | -2.155 | 2.520  | 4     |

|     |       |       |       |         |        |        |   |
|-----|-------|-------|-------|---------|--------|--------|---|
| 2.0 | 0.155 | 0.149 | 0.152 | -29.447 | -3.307 | 1.432  | 4 |
| 2.0 | 0.155 | 0.149 | 0.149 | -28.743 | -3.087 | 0.904  | 4 |
| 2.0 | 0.154 | 0.146 | 0.143 | -27.849 | -4.109 | -0.168 | 4 |
| 0.6 | 0.061 | 0.077 | 0.074 | -76.434 | 5.626  | 3.173  | 5 |
| 0.6 | 0.057 | 0.074 | 0.060 | -76.091 | 6.251  | 1.558  | 5 |
| 0.6 | 0.057 | 0.073 | 0.056 | -75.089 | 5.850  | 0.795  | 5 |
| 0.6 | 0.055 | 0.072 | 0.054 | -75.480 | 6.122  | 0.674  | 5 |
| 0.6 | 0.052 | 0.070 | 0.052 | -77.155 | 6.860  | 0.814  | 5 |
| 0.6 | 0.052 | 0.065 | 0.043 | -75.252 | 4.244  | -0.988 | 5 |
| 0.4 | 0.032 | 0.046 | 0.032 | -86.712 | 3.859  | 0.042  | 6 |
| 0.4 | 0.031 | 0.044 | 0.027 | -86.519 | 3.962  | -0.603 | 6 |
| 0.4 | 0.029 | 0.044 | 0.023 | -86.185 | 4.309  | -1.120 | 6 |
| 0.4 | 0.028 | 0.043 | 0.021 | -86.725 | 4.968  | -1.157 | 6 |
| 0.4 | 0.027 | 0.042 | 0.018 | -86.990 | 4.750  | -1.460 | 6 |
| 0.4 | 0.026 | 0.039 | 0.017 | -87.462 | 4.113  | -1.614 | 6 |

**Table S8.** Fluorescence response pattern obtained from an array of the tricolor UCNPs@SiO<sub>2</sub>-F probes against perfluorohexanoic acid at different concentrations ( $4.0 \times 10^{-8} - 6.0 \times 10^{-7}$  M). LDA was carried out and resulting in 3 factors of the canonical scores and group generation. Jackknifed classification matrix showed the 100% correct classification.

| Concentration<br>(10 <sup>-7</sup> M) | Fluorescence Response Pattern |       |       | Results LDA |         |        | Group |
|---------------------------------------|-------------------------------|-------|-------|-------------|---------|--------|-------|
|                                       | C1                            | C2    | C3    | F1          | F2      | F3     |       |
| 20                                    | 0.386                         | 0.456 | 0.398 | 100.707     | 4.755   | 0.151  | 1     |
| 20                                    | 0.383                         | 0.452 | 0.394 | 99.409      | 5.254   | 0.296  | 1     |
| 20                                    | 0.381                         | 0.446 | 0.394 | 98.965      | 3.848   | -2.212 | 1     |
| 20                                    | 0.379                         | 0.444 | 0.393 | 98.317      | 3.353   | -1.830 | 1     |
| 20                                    | 0.376                         | 0.442 | 0.390 | 97.377      | 3.236   | -1.391 | 1     |
| 20                                    | 0.375                         | 0.437 | 0.385 | 96.227      | 5.024   | -2.656 | 1     |
| 6.0                                   | 0.168                         | 0.205 | 0.183 | 20.439      | 1.225   | 2.906  | 2     |
| 6.0                                   | 0.167                         | 0.205 | 0.180 | 19.734      | 2.734   | 3.214  | 2     |
| 6.0                                   | 0.163                         | 0.199 | 0.179 | 18.845      | 0.545   | 2.187  | 2     |
| 6.0                                   | 0.163                         | 0.198 | 0.179 | 18.740      | 0.571   | 2.224  | 2     |
| 6.0                                   | 0.162                         | 0.196 | 0.176 | 18.009      | 1.939   | 1.683  | 2     |
| 6.0                                   | 0.160                         | 0.192 | 0.174 | 17.340      | 1.290   | 0.850  | 2     |
| 4.0                                   | 0.120                         | 0.160 | 0.156 | 6.535       | -9.415  | 6.336  | 3     |
| 4.0                                   | 0.119                         | 0.157 | 0.156 | 6.174       | -10.450 | 5.665  | 3     |
| 4.0                                   | 0.118                         | 0.155 | 0.156 | 6.023       | -10.610 | 4.932  | 3     |
| 4.0                                   | 0.117                         | 0.154 | 0.155 | 5.592       | -11.151 | 5.090  | 3     |
| 4.0                                   | 0.115                         | 0.152 | 0.154 | 5.073       | -11.605 | 5.494  | 3     |

|     |       |       |       |         |         |        |   |
|-----|-------|-------|-------|---------|---------|--------|---|
| 4.0 | 0.114 | 0.151 | 0.150 | 4.227   | -10.030 | 5.385  | 3 |
| 2.0 | 0.074 | 0.075 | 0.100 | -13.145 | -7.807  | -7.950 | 4 |
| 2.0 | 0.072 | 0.075 | 0.097 | -13.946 | -7.429  | -6.883 | 4 |
| 2.0 | 0.070 | 0.073 | 0.096 | -14.344 | -7.924  | -7.257 | 4 |
| 2.0 | 0.069 | 0.073 | 0.095 | -14.870 | -7.736  | -6.356 | 4 |
| 2.0 | 0.068 | 0.072 | 0.091 | -15.735 | -5.708  | -5.708 | 4 |
| 2.0 | 0.066 | 0.072 | 0.091 | -16.054 | -6.514  | -4.913 | 4 |
| 0.6 | 0.047 | 0.053 | 0.057 | -25.409 | 1.223   | -2.059 | 5 |
| 0.6 | 0.046 | 0.048 | 0.057 | -25.835 | 0.050   | -3.825 | 5 |
| 0.6 | 0.045 | 0.047 | 0.057 | -25.927 | -0.012  | -3.777 | 5 |
| 0.6 | 0.044 | 0.047 | 0.057 | -26.092 | -0.313  | -3.494 | 5 |
| 0.6 | 0.044 | 0.046 | 0.053 | -26.897 | 1.537   | -3.229 | 5 |
| 0.6 | 0.042 | 0.046 | 0.050 | -27.617 | 2.431   | -2.344 | 5 |
| 0.4 | 0.017 | 0.026 | 0.025 | -36.746 | 2.726   | 2.807  | 6 |
| 0.4 | 0.023 | 0.026 | 0.022 | -36.295 | 7.455   | -0.042 | 6 |
| 0.4 | 0.018 | 0.026 | 0.022 | -37.219 | 5.148   | 2.559  | 6 |
| 0.4 | 0.016 | 0.026 | 0.021 | -37.668 | 4.930   | 3.489  | 6 |
| 0.4 | 0.016 | 0.026 | 0.020 | -37.744 | 5.029   | 3.457  | 6 |
| 0.4 | 0.011 | 0.024 | 0.020 | -38.655 | 2.981   | 4.978  | 6 |

**Table S9.** Detection and identification of unknown PFCs samples ( $6.0 \times 10^{-7}$  M in tap water). All unknown samples could be assigned to the corresponding LDA group defined by the training matrix. According to the verification, 21 unknown samples were classified, representing an accuracy of 100%. The detailed information of PFCs was shown in Table S1.

| Samples # | Fluorescence Response Pattern |       |       | Analytes       |              |
|-----------|-------------------------------|-------|-------|----------------|--------------|
|           | C1                            | C2    | C3    | Identification | Verification |
| 1         | 0.338                         | 0.326 | 0.295 | PFOS           | PFOS         |
| 2         | 0.402                         | 0.415 | 0.388 | PFDA           | PFDA         |
| 3         | 0.326                         | 0.299 | 0.294 | PFNA           | PFNA         |
| 4         | 0.288                         | 0.271 | 0.252 | PFOA           | PFOA         |
| 5         | 0.255                         | 0.242 | 0.222 | PFHpA          | PFHpA        |
| 6         | 0.201                         | 0.223 | 0.185 | PFHxA          | PFHxA        |
| 7         | 0.221                         | 0.219 | 0.186 | PFHxS          | PFHxS        |
| 8         | 0.337                         | 0.327 | 0.298 | PFOS           | PFOS         |
| 9         | 0.401                         | 0.414 | 0.391 | PFDA           | PFDA         |
| 10        | 0.321                         | 0.305 | 0.297 | PFNA           | PFNA         |
| 11        | 0.290                         | 0.270 | 0.255 | PFOA           | PFOA         |
| 12        | 0.256                         | 0.234 | 0.230 | PFHpA          | PFHpA        |
| 13        | 0.203                         | 0.225 | 0.187 | PFHxA          | PFHxA        |

|    |       |       |       |       |       |
|----|-------|-------|-------|-------|-------|
| 14 | 0.234 | 0.223 | 0.188 | PFHxS | PFHxS |
| 15 | 0.340 | 0.328 | 0.307 | PFOS  | PFOS  |
| 16 | 0.403 | 0.423 | 0.391 | PFDA  | PFDA  |
| 17 | 0.325 | 0.302 | 0.295 | PFNA  | PFNA  |
| 18 | 0.282 | 0.268 | 0.246 | PFOA  | PFOA  |
| 19 | 0.249 | 0.240 | 0.218 | PFHpA | PFHpA |
| 20 | 0.207 | 0.221 | 0.186 | PFHxA | PFHxA |
| 21 | 0.232 | 0.224 | 0.186 | PFHxS | PFHxS |

**Table S10.** Detection and identification of unknown PFCs samples ( $6.0 \times 10^{-7}$  M in food packing). All unknown samples could be assigned to the corresponding LDA group defined by the training matrix. According to the verification, 19 unknown samples were classified, representing an accuracy of 90.5 %. The detailed information of PFCs was shown in Table S1.

| Samples # | Fluorescence Response Pattern |       |       | Analytes       |              |
|-----------|-------------------------------|-------|-------|----------------|--------------|
|           | C1                            | C2    | C3    | Identification | Verification |
| 1         | 0.343                         | 0.326 | 0.300 | PFOS           | PFOS         |
| 2         | 0.397                         | 0.413 | 0.391 | PFDA           | PFDA         |
| 3         | 0.329                         | 0.301 | 0.294 | PFNA           | PFNA         |
| 4         | 0.288                         | 0.269 | 0.248 | PFOA           | PFOA         |
| 5         | 0.255                         | 0.242 | 0.231 | PFHpA          | PFHpA        |
| 6         | 0.203                         | 0.218 | 0.185 | PFHxA          | PFHxA        |
| 7         | 0.235                         | 0.223 | 0.187 | PFHxS          | PFHxS        |
| 8         | 0.342                         | 0.327 | 0.304 | PFOS           | PFOS         |
| 9         | 0.400                         | 0.411 | 0.385 | PFDA           | PFDA         |
| 10        | 0.334                         | 0.300 | 0.299 | PFNA           | PFNA         |
| 11        | 0.288                         | 0.271 | 0.255 | PFOA           | PFOA         |
| 12        | 0.290                         | 0.267 | 0.248 | PFOA           | PFHpA        |
| 13        | 0.238                         | 0.223 | 0.185 | PFHxS          | PFHxA        |
| 14        | 0.224                         | 0.221 | 0.185 | PFHxS          | PFHxS        |
| 15        | 0.346                         | 0.323 | 0.308 | PFOS           | PFOS         |
| 16        | 0.401                         | 0.413 | 0.387 | PFDA           | PFDA         |
| 17        | 0.338                         | 0.301 | 0.293 | PFNA           | PFNA         |
| 18        | 0.283                         | 0.272 | 0.250 | PFOA           | PFOA         |
| 19        | 0.257                         | 0.238 | 0.220 | PFHpA          | PFHpA        |
| 20        | 0.204                         | 0.218 | 0.180 | PFHxA          | PFHxA        |
| 21        | 0.226                         | 0.223 | 0.185 | PFHxS          | PFHxS        |

**Table S11.** Detection and identification of unknown PFCs samples ( $6.0 \times 10^{-7}$  M in

river water). All unknown samples could be assigned to the corresponding LDA group defined by the training matrix. According to the verification, 20 unknown samples were classified, representing an accuracy of 95.2 %. The detailed information of PFCs was shown in Table S1.

| Samples | Fluorescence Response Pattern |       |       | Analytes       |              |
|---------|-------------------------------|-------|-------|----------------|--------------|
| #       | C1                            | C2    | C3    | Identification | Verification |
| 1       | 0.338                         | 0.325 | 0.305 | PFOS           | PFOS         |
| 2       | 0.395                         | 0.416 | 0.391 | PFDA           | PFDA         |
| 3       | 0.328                         | 0.296 | 0.294 | PFNA           | PFNA         |
| 4       | 0.289                         | 0.272 | 0.250 | PFOA           | PFOA         |
| 5       | 0.256                         | 0.240 | 0.227 | PFHpA          | PFHpA        |
| 6       | 0.202                         | 0.226 | 0.185 | PFHxA          | PFHxA        |
| 7       | 0.221                         | 0.220 | 0.190 | PFHxS          | PFHxS        |
| 8       | 0.337                         | 0.330 | 0.296 | PFOS           | PFOS         |
| 9       | 0.393                         | 0.418 | 0.389 | PFDA           | PFDA         |
| 10      | 0.332                         | 0.304 | 0.302 | PFNA           | PFNA         |
| 11      | 0.290                         | 0.269 | 0.253 | PFOA           | PFOA         |
| 12      | 0.253                         | 0.240 | 0.219 | PFHpA          | PFHpA        |
| 13      | 0.198                         | 0.221 | 0.185 | PFHxA          | PFHxA        |
| 14      | 0.222                         | 0.229 | 0.190 | PFHxS          | PFHxS        |
| 15      | 0.345                         | 0.324 | 0.300 | PFOS           | PFOS         |
| 16      | 0.399                         | 0.417 | 0.384 | PFDA           | PFDA         |
| 17      | 0.329                         | 0.301 | 0.300 | PFNA           | PFNA         |
| 18      | 0.290                         | 0.269 | 0.242 | PFOA           | PFOA         |
| 19      | 0.243                         | 0.240 | 0.228 | PFHpA          | PFHpA        |
| 20      | 0.203                         | 0.225 | 0.188 | PFHxA          | PFHxA        |
| 21      | 0.204                         | 0.223 | 0.189 | PFHxA          | PFHxS        |

**Table S12.** Detection and identification of unknown PFCs samples ( $6.0 \times 10^{-7}$  M in surface seawater). All unknown samples could be assigned to the corresponding LDA group defined by the training matrix. According to the verification, 18 unknown samples were classified, representing an accuracy of 85.7 %. The detailed information of PFCs was shown in Table S1.

| Samples | Fluorescence Response Pattern |    |    | Analytes       |              |
|---------|-------------------------------|----|----|----------------|--------------|
| #       | C1                            | C2 | C3 | Identification | Verification |

|    |       |       |       |       |       |
|----|-------|-------|-------|-------|-------|
| 1  | 0.345 | 0.323 | 0.307 | PFOS  | PFOS  |
| 2  | 0.400 | 0.414 | 0.386 | PFDA  | PFDA  |
| 3  | 0.327 | 0.297 | 0.295 | PFNA  | PFNA  |
| 4  | 0.288 | 0.269 | 0.255 | PFOA  | PFOA  |
| 5  | 0.251 | 0.243 | 0.230 | PFHpA | PFHpA |
| 6  | 0.200 | 0.220 | 0.185 | PFHxA | PFHxA |
| 7  | 0.207 | 0.221 | 0.187 | PFHxA | PFHxS |
| 8  | 0.338 | 0.329 | 0.296 | PFOS  | PFOS  |
| 9  | 0.401 | 0.424 | 0.387 | PFDA  | PFDA  |
| 10 | 0.335 | 0.297 | 0.293 | PFNA  | PFNA  |
| 11 | 0.289 | 0.270 | 0.255 | PFOA  | PFOA  |
| 12 | 0.251 | 0.238 | 0.218 | PFHpA | PFHpA |
| 13 | 0.218 | 0.223 | 0.189 | PFHxS | PFHxA |
| 14 | 0.220 | 0.229 | 0.191 | PFHxS | PFHxS |
| 15 | 0.338 | 0.322 | 0.296 | PFOS  | PFOS  |
| 16 | 0.402 | 0.413 | 0.384 | PFDA  | PFDA  |
| 17 | 0.324 | 0.300 | 0.302 | PFNA  | PFNA  |
| 18 | 0.287 | 0.272 | 0.245 | PFOA  | PFOA  |
| 19 | 0.239 | 0.238 | 0.223 | PFHpA | PFHpA |
| 20 | 0.200 | 0.226 | 0.187 | PFHxA | PFHxA |
| 21 | 0.239 | 0.234 | 0.225 | PFHpA | PFHxS |

**Table S13.** Fluorescence response patterns using the sensor array against the PFCPs mixtures of perfluorooctane sulfonate potassium (PFOS) and perfluorohexanoic acid (PFHxA) in tap water with different ratios (100:0, 80:20, 60:40, 50:50, 40:60, 20:80, and 0:100, respectively). LDA was carried out and resulting in 3 factors of the canonical scores and group generation. The concentration PFOS and PFHxA were  $6.0 \times 10^{-7}$  M.

| PFOS:PFHxA | Fluorescence Response Pattern |       |       | Results LDA |        |        | Group |
|------------|-------------------------------|-------|-------|-------------|--------|--------|-------|
|            | C1                            | C2    | C3    | F1          | F2     | F3     |       |
| 0:100      | 0.168                         | 0.200 | 0.167 | -15.103     | -0.050 | 1.472  | 1     |
| 0:100      | 0.166                         | 0.200 | 0.164 | -15.298     | 0.141  | 1.016  | 1     |
| 0:100      | 0.163                         | 0.195 | 0.163 | -16.089     | -0.273 | 2.114  | 1     |
| 0:100      | 0.159                         | 0.194 | 0.147 | -15.597     | -1.246 | -1.267 | 1     |
| 0:100      | 0.158                         | 0.192 | 0.146 | -15.875     | -1.549 | -0.879 | 1     |
| 0:100      | 0.154                         | 0.191 | 0.145 | -16.461     | -0.936 | -0.818 | 1     |
| 80:20      | 0.198                         | 0.222 | 0.203 | -10.915     | 1.179  | 3.274  | 2     |
| 80:20      | 0.196                         | 0.220 | 0.201 | -11.223     | 0.990  | 3.329  | 2     |
| 80:20      | 0.192                         | 0.219 | 0.193 | -11.398     | 0.962  | 1.875  | 2     |
| 80:20      | 0.186                         | 0.210 | 0.181 | -12.210     | -0.735 | 1.699  | 2     |
| 80:20      | 0.185                         | 0.208 | 0.180 | -12.524     | -1.224 | 2.080  | 2     |



|       |       |       |       |         |        |        |   |
|-------|-------|-------|-------|---------|--------|--------|---|
| 80:20 | 0.181 | 0.202 | 0.178 | -13.378 | -1.865 | 3.237  | 2 |
| 60:40 | 0.225 | 0.255 | 0.219 | -4.799  | 2.981  | -2.311 | 3 |
| 60:40 | 0.218 | 0.255 | 0.214 | -5.761  | 4.350  | -3.232 | 3 |
| 60:40 | 0.212 | 0.253 | 0.214 | -6.849  | 5.226  | -2.784 | 3 |
| 60:40 | 0.207 | 0.250 | 0.210 | -7.686  | 5.560  | -2.926 | 3 |
| 60:40 | 0.203 | 0.249 | 0.206 | -8.105  | 5.753  | -3.454 | 3 |
| 60:40 | 0.202 | 0.247 | 0.202 | -8.188  | 5.305  | -3.786 | 3 |
| 50:50 | 0.287 | 0.268 | 0.248 | 4.597   | -6.354 | 0.453  | 4 |
| 50:50 | 0.281 | 0.267 | 0.247 | 3.631   | -5.036 | 0.316  | 4 |
| 50:50 | 0.278 | 0.265 | 0.245 | 3.177   | -5.052 | 0.404  | 4 |
| 50:50 | 0.278 | 0.265 | 0.240 | 3.501   | -5.590 | -0.552 | 4 |
| 50:50 | 0.278 | 0.263 | 0.232 | 3.844   | -6.837 | -1.604 | 4 |
| 50:50 | 0.276 | 0.262 | 0.229 | 3.715   | -6.900 | -1.992 | 4 |
| 40:60 | 0.310 | 0.294 | 0.275 | 8.586   | -3.414 | -0.852 | 5 |
| 40:60 | 0.310 | 0.291 | 0.274 | 8.422   | -4.194 | -0.279 | 5 |
| 40:60 | 0.309 | 0.290 | 0.270 | 8.463   | -4.823 | -0.617 | 5 |
| 40:60 | 0.308 | 0.286 | 0.266 | 8.364   | -5.719 | -0.763 | 5 |
| 40:60 | 0.301 | 0.277 | 0.262 | 6.715   | -6.461 | 1.097  | 5 |
| 40:60 | 0.297 | 0.276 | 0.260 | 6.096   | -5.723 | 0.806  | 5 |
| 20:80 | 0.331 | 0.321 | 0.306 | 12.097  | 0.320  | -1.559 | 6 |
| 20:80 | 0.326 | 0.321 | 0.306 | 11.235  | 1.334  | -1.502 | 6 |
| 20:80 | 0.319 | 0.318 | 0.301 | 10.086  | 2.193  | -1.922 | 6 |
| 20:80 | 0.313 | 0.318 | 0.297 | 9.278   | 3.186  | -2.594 | 6 |
| 20:80 | 0.313 | 0.317 | 0.295 | 9.317   | 2.809  | -2.666 | 6 |
| 20:80 | 0.312 | 0.316 | 0.284 | 9.997   | 1.595  | -4.927 | 6 |
| 100:0 | 0.352 | 0.345 | 0.355 | 13.864  | 5.528  | 2.523  | 7 |
| 100:0 | 0.351 | 0.343 | 0.355 | 13.698  | 5.378  | 2.779  | 7 |
| 100:0 | 0.347 | 0.342 | 0.353 | 12.998  | 5.995  | 2.765  | 7 |
| 100:0 | 0.346 | 0.336 | 0.352 | 12.481  | 4.792  | 4.116  | 7 |
| 100:0 | 0.346 | 0.334 | 0.347 | 12.655  | 3.809  | 3.696  | 7 |
| 100:0 | 0.335 | 0.327 | 0.341 | 10.641  | 4.596  | 4.233  | 7 |

**Table S14.** Fluorescence response patterns using the sensor array against the PFCPs mixtures of perfluorooctane sulfonate potassium (PFOS) and perfluorohexanoic acid (PFHxA) in food packing with different ratios (100:0, 80:20, 60:40, 50:50, 40:60, 20:80, and 0:100, respectively). LDA was carried out and resulting in 3 factors of the canonical scores and group generation. The concentration PFOS and PFHxA were  $6.0 \times 10^{-7}$  M.

| PFOS:PFHxA | Fluorescence Response Pattern | Results LDA | Group |
|------------|-------------------------------|-------------|-------|
|------------|-------------------------------|-------------|-------|

|       | C1    | C2    | C3    | F1      | F2     | F3     |   |
|-------|-------|-------|-------|---------|--------|--------|---|
| 0:100 | 0.159 | 0.180 | 0.129 | -17.375 | -1.929 | -0.130 | 1 |
| 0:100 | 0.159 | 0.176 | 0.129 | -17.260 | -1.923 | -1.121 | 1 |
| 0:100 | 0.153 | 0.173 | 0.125 | -18.637 | -1.010 | -0.331 | 1 |
| 0:100 | 0.151 | 0.168 | 0.124 | -18.687 | -0.903 | -1.357 | 1 |
| 0:100 | 0.150 | 0.168 | 0.124 | -19.093 | -0.419 | -0.991 | 1 |
| 0:100 | 0.149 | 0.167 | 0.105 | -19.628 | -5.813 | -0.189 | 1 |
| 80:20 | 0.178 | 0.206 | 0.159 | -14.028 | 1.769  | 1.603  | 2 |
| 80:20 | 0.176 | 0.205 | 0.153 | -14.435 | 0.214  | 1.892  | 2 |
| 80:20 | 0.175 | 0.203 | 0.150 | -14.714 | -0.104 | 1.795  | 2 |
| 80:20 | 0.170 | 0.202 | 0.147 | -16.035 | 0.910  | 2.990  | 2 |
| 80:20 | 0.167 | 0.193 | 0.144 | -16.176 | 0.526  | 1.265  | 2 |
| 80:20 | 0.164 | 0.187 | 0.144 | -16.447 | 1.174  | 0.119  | 2 |
| 60:40 | 0.223 | 0.236 | 0.223 | -3.205  | 4.493  | -3.386 | 3 |
| 60:40 | 0.216 | 0.234 | 0.212 | -5.091  | 3.660  | -1.750 | 3 |
| 60:40 | 0.215 | 0.233 | 0.211 | -5.375  | 4.058  | -1.654 | 3 |
| 60:40 | 0.208 | 0.231 | 0.206 | -7.110  | 5.070  | -0.451 | 3 |
| 60:40 | 0.207 | 0.219 | 0.205 | -6.582  | 4.656  | -3.522 | 3 |
| 60:40 | 0.203 | 0.219 | 0.205 | -7.446  | 6.109  | -2.834 | 3 |
| 50:50 | 0.253 | 0.284 | 0.238 | 1.224   | -0.144 | 2.698  | 4 |
| 50:50 | 0.249 | 0.279 | 0.237 | 0.470   | 1.096  | 2.419  | 4 |
| 50:50 | 0.248 | 0.275 | 0.235 | 0.582   | 0.456  | 1.440  | 4 |
| 50:50 | 0.248 | 0.275 | 0.234 | 0.410   | 0.224  | 1.637  | 4 |
| 50:50 | 0.247 | 0.274 | 0.234 | 0.300   | 0.396  | 1.630  | 4 |
| 50:50 | 0.247 | 0.274 | 0.227 | 0.058   | -1.538 | 1.956  | 4 |
| 40:60 | 0.295 | 0.308 | 0.265 | 10.745  | -7.655 | -1.087 | 5 |
| 40:60 | 0.289 | 0.308 | 0.260 | 9.217   | -6.854 | 0.362  | 5 |
| 40:60 | 0.289 | 0.307 | 0.260 | 9.301   | -6.957 | 0.030  | 5 |
| 40:60 | 0.288 | 0.291 | 0.259 | 10.057  | -8.018 | -3.855 | 5 |
| 40:60 | 0.286 | 0.290 | 0.257 | 9.455   | -7.553 | -3.492 | 5 |
| 40:60 | 0.282 | 0.290 | 0.253 | 8.564   | -7.374 | -2.707 | 5 |
| 20:80 | 0.315 | 0.339 | 0.299 | 14.175  | -3.288 | 1.523  | 6 |
| 20:80 | 0.313 | 0.336 | 0.297 | 14.034  | -3.386 | 1.164  | 6 |
| 20:80 | 0.311 | 0.336 | 0.296 | 13.346  | -2.541 | 1.633  | 6 |
| 20:80 | 0.310 | 0.333 | 0.296 | 13.286  | -2.566 | 1.225  | 6 |
| 20:80 | 0.309 | 0.330 | 0.292 | 13.297  | -3.779 | 0.522  | 6 |
| 20:80 | 0.302 | 0.328 | 0.285 | 11.407  | -2.815 | 2.044  | 6 |
| 100:0 | 0.329 | 0.355 | 0.350 | 17.602  | 8.025  | 0.379  | 7 |
| 100:0 | 0.327 | 0.354 | 0.342 | 16.939  | 6.366  | 1.109  | 7 |
| 100:0 | 0.320 | 0.343 | 0.340 | 16.049  | 7.663  | -0.477 | 7 |
| 100:0 | 0.320 | 0.343 | 0.337 | 15.957  | 6.904  | -0.405 | 7 |
| 100:0 | 0.319 | 0.339 | 0.337 | 15.910  | 7.114  | -1.095 | 7 |
| 100:0 | 0.315 | 0.336 | 0.328 | 14.942  | 5.687  | -0.603 | 7 |

**Table S15. Comparison of different detection methods**

| Methods                                   | Limit of detection (M) | Multiplexing ability | Sample source             | Acquisition time (h) | Reference |
|-------------------------------------------|------------------------|----------------------|---------------------------|----------------------|-----------|
| Molecularly imprinted fluorescence sensor | $10^{-8}$              | 1                    | Water                     | 0.5                  | [1]       |
| Three-signal Assay                        | $10^{-8}$              | 1                    | Tap water                 | 0.5                  | [2]       |
| Fluorescence Detection                    | $10^{-10}$             | 1                    | Water samples             | 1.0                  | [3]       |
| Fluorescent Visual Detection              | $10^{-8}$              | 1                    | Environmental water       | 0.5                  | [4]       |
| Fluorescence Detection                    | $10^{-4}$              | 2                    | -                         | -                    | [5]       |
| UCNPs@SiO <sub>2</sub> -F sensor array    | $10^{-7}$              | 7                    | Tap water<br>Food packing | 0.5<br>1.0           | This work |

**Reference:**

- [1] H. Feng, N. Wang, T. Tran, T. L. Yuan, J. Li, Q. Cai, Surface molecular imprinting on dye-(NH<sub>2</sub>)-SiO<sub>2</sub> NPs for specific recognition and direct fluorescent quantification of perfluorooctane sulfonate, *Sensors and Actuators B: Chemical* 195 (2014) 266-273.
- [2] Q. Chen, Z. Cheng, L. Du, P. Zhu, K. Tan, A sensitive three-signal assay for the determination of PFOS based on the interaction with Nile blue A, *Analytical Methods* 10(25) (2018) 3052-3058.
- [3] L. Lin, S. Zhou, H. Guo, Y. Chen, S. Lin, L. Yan, K. Li, J. Li, Nitrogen-doped carbon dots as an effective fluorescence enhancing system for the determination of perfluorooctyl sulfonate, *Mikrochimica acta* 186(6) (2019) 380.

- [4] Z. Cheng, H. Dong, J. Liang, F. Zhang, X. Chen, L. Du, K. Tan, Highly selective fluorescent visual detection of perfluorooctane sulfonate via blue fluorescent carbon dots and berberine chloride hydrate, *Spectrochimica acta. Part A, Molecular and biomolecular spectroscopy* 207 (2019) 262-269.
- [5] Z. Jin, M. Chi, Q. He, Y. Pan, C. Sun, Perfluoroalkane sulfonyl fluorides non-covalently bind to human serum albumin at Sudlow's sites, *Toxicology letters* 301 (2019) 17-23.
